# Supplementary material for: The Nurses’ Well-Being Index and Factors Influencing This Index among Nurses in Central China: A Cross-Sectional Study
Source: PubMed Central journal article supplement (PMC4682979; doi:10.1371/journal.pone.0144414), 2015-12-17
Supplement: pone.0144414.s002.pdf [file pone.0144414.s002.pdf]

## 武汉大学医学部伦理委员会审批件

编号:

|                                                                                                                                                                                                                                                                                                                                                                                                                                                                                                                                                                                                                                                                                                                                                                                                                                                                                                                                                                                                                                                                                                                                                                        |                                                                                                                                                                                                                                                                                                                                                                                                                                                  |       |     |
|------------------------------------------------------------------------------------------------------------------------------------------------------------------------------------------------------------------------------------------------------------------------------------------------------------------------------------------------------------------------------------------------------------------------------------------------------------------------------------------------------------------------------------------------------------------------------------------------------------------------------------------------------------------------------------------------------------------------------------------------------------------------------------------------------------------------------------------------------------------------------------------------------------------------------------------------------------------------------------------------------------------------------------------------------------------------------------------------------------------------------------------------------------------------|--------------------------------------------------------------------------------------------------------------------------------------------------------------------------------------------------------------------------------------------------------------------------------------------------------------------------------------------------------------------------------------------------------------------------------------------------|-------|-----|
| 研究项目名称                                                                                                                                                                                                                                                                                                                                                                                                                                                                                                                                                                                                                                                                                                                                                                                                                                                                                                                                                                                                                                                                                                                                                                 | 湖北汉川基层医务人员工作价值观和幸福感调查                                                                                                                                                                                                                                                                                                                                                                                                                            |       |     |
| 研究内容和意义                                                                                                                                                                                                                                                                                                                                                                                                                                                                                                                                                                                                                                                                                                                                                                                                                                                                                                                                                                                                                                                                                                                                                                | <p>随着生命科学和医学科学技术的日益发展及医疗模式的不断转变，在临床实践过程中，医务人员的传统价值观和幸福感受到极大的冲击，面对着越来越多的潜在的价值冲突如多种伦理原则的相互冲突、个人的道德准则与特定的职业伦理要求间的相互冲突。目前对医务人员专业价值观和幸福感的研究也是近年来西方国家研究的一个热点，国内对这一问题也开始关注。然而，国内针对基层医疗机构医务人员幸福感和工作价值观的研究还较少，关注基层医疗机构医务人员工作价值观和幸福感，对认识与改善其健康水平和生活质量具有积极的指导意义。本研究采用综合幸福感问卷（MHQ）和采用 Elizur 等编制的工作价值观量表，运用便利抽样法调查湖北汉川医疗机构医务人员。</p> <p>每个入选的医生和护士将要求填写一份调查问卷，此次调查采用完全匿名的方式。调查问卷中不会收集医生护士的姓名和其他可用于个人识别的相关信息，也不会从医疗机构管理者处收集信息，本课题组确保数据收集过程中对个人隐私权的充分尊重和保护。</p> |       |     |
| 申请单位                                                                                                                                                                                                                                                                                                                                                                                                                                                                                                                                                                                                                                                                                                                                                                                                                                                                                                                                                                                                                                                                                                                                                                   | 公共卫生学院                                                                                                                                                                                                                                                                                                                                                                                                                                           | 项目负责人 | 孟润堂 |
| <p>医学伦理委员会审批意见：</p> <p>经审核符合相关规定，同意开展该项目。</p> <div style="display: flex; justify-content: space-around; align-items: center; margin-top: 20px;"> <div style="text-align: center;"> <br/>             刘晴         </div> <div style="text-align: center;"> <br/>             孟润堂         </div> <div style="text-align: center;"> <br/>             张红         </div> <div style="text-align: center;"> <br/>             张红         </div> <div style="text-align: center;"> <br/>             张红         </div> </div> <div style="text-align: right; margin-top: 20px;"> <br/>             武汉大学医学部伦理委员会<br/>             2011年6月         </div> |                                                                                                                                                                                                                                                                                                                                                                                                                                                  |       |     |
